# Supplementary material
Source: PubMed Central journal article supplement (PMC6456044)
Supplement: NIHMS1517916-supplement-1.pdf [file NIHMS1517916-supplement-1.pdf]

Supplementary Material

Tropolone-Induced Effects on the Unfolded Protein Response Pathway and Apoptosis in  
Myeloma Cells Are Dependent on Iron

Leukemia Research

Staci L. Haney<sup>1</sup>, Michelle L. Varney<sup>1</sup>, Hannah R. Safranek<sup>1</sup>, Yashpal S. Chhonker<sup>2</sup>, Narendran G-Dayananadan<sup>3</sup>, Geoffrey Talmon<sup>4</sup>, Daryl J. Murry<sup>2</sup>, Andrew J. Wiemer<sup>3</sup>, Dennis L. Wright<sup>3</sup>, Sarah A. Holstein<sup>1\*</sup>

<sup>1</sup>Department of Internal Medicine, University of Nebraska Medical Center, Omaha, NE, USA;

<sup>2</sup>Department of Pharmacy Practice, University of Nebraska Medical Center, Omaha, NE, USA;

<sup>3</sup>Department of Pharmaceutical Sciences, University of Connecticut, Storrs, CT, USA;

<sup>4</sup>Department of Pathology and Microbiology, University of Nebraska Medical Center, Omaha, NE, USA

**\*Corresponding Author:**

Sarah A. Holstein, MD, PhD

Department of Internal Medicine

University of Nebraska Medical Center

986840 Nebraska Medical Center

Omaha, NE 68198

Tel: 402-559-8500

Fax: 402-559-6520

Email: [sarah.holstein@unmc.edu](mailto:sarah.holstein@unmc.edu)

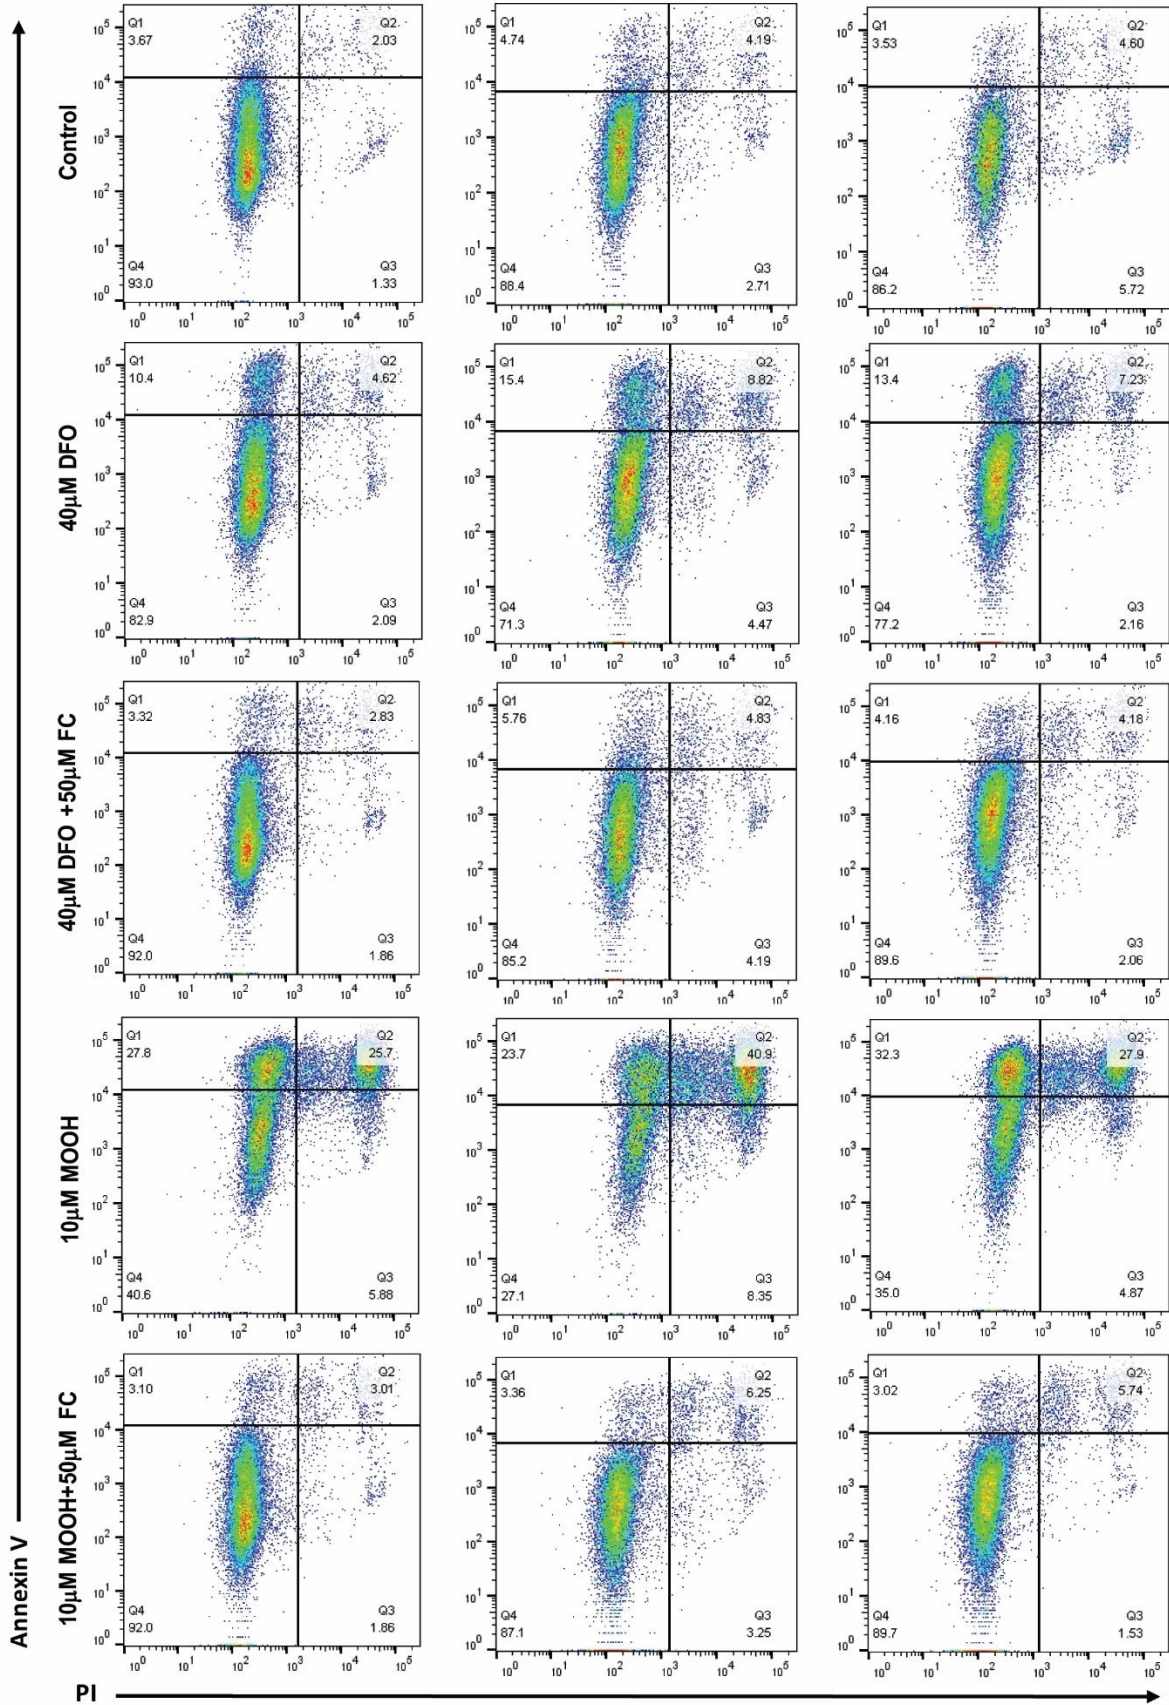

**Supplemental Figure 1. Iron abrogates MO-OH-Nap and DFO induced apoptosis in MM cells.** Flow diagrams of U266 cells treated for 48 hours with DFO or MO-OH-Nap in the presence and absence of FeCl<sub>3</sub> (FC). Apoptosis was measured via flow cytometry using Annexin V (Y-axis) and propidium iodide (X-axis). 10,000 cells per group were recorded. Percentage of cells in each quadrant is shown. Control samples were treated with solvent control (DMSO). N=3.

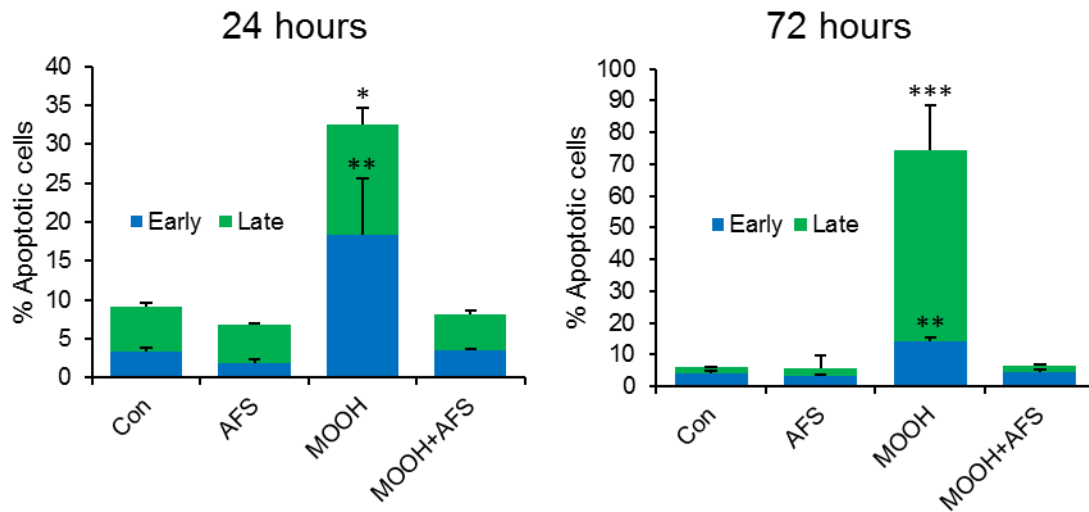

**Supplemental Figure 2. Iron abrogates MO-OH-Nap-induced apoptosis in MM cells.**

Summary of flow data for U266 cells treated for 24 or 72 hours with 10  $\mu\text{M}$  MO-OH-Nap (MOOH) in the presence and absence of 50  $\mu\text{M}$   $\text{FeSO}_4$  (AFS). Apoptosis was measured via flow cytometry using Annexin V and propidium iodide. Early apoptotic are defined as AnnexinV+/PI- and late apoptotic are defined as AnnexinV+/PI+. Data are shown as average percentage of early and late apoptotic cells (n=3, \* denotes  $p < 0.01$ , \*\* denotes  $p < 0.001$ , \*\*\*denoted  $p < 0.0001$ , per t-test).

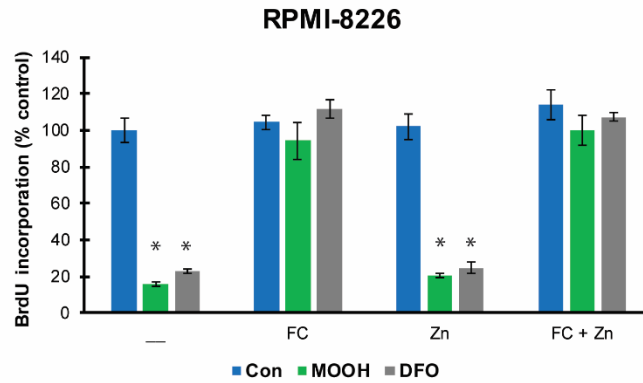

**Supplemental Figure 3. The ability for MO-OH-Nap and DFO to inhibit proliferation is independent of zinc.** RPMI-8226 cells were treated with DMSO (solvent control), 2.5 $\mu$ M MO-OH-Nap (MOOH), or 40 $\mu$ M DFO in the presence or absence of 50 $\mu$ M FeCl<sub>3</sub> (FC) or 50 $\mu$ M ZnCl<sub>2</sub> (Zn). BrdU incorporation was measured 48 hours later. (n=3, \* denotes p<0.01 per t-test)

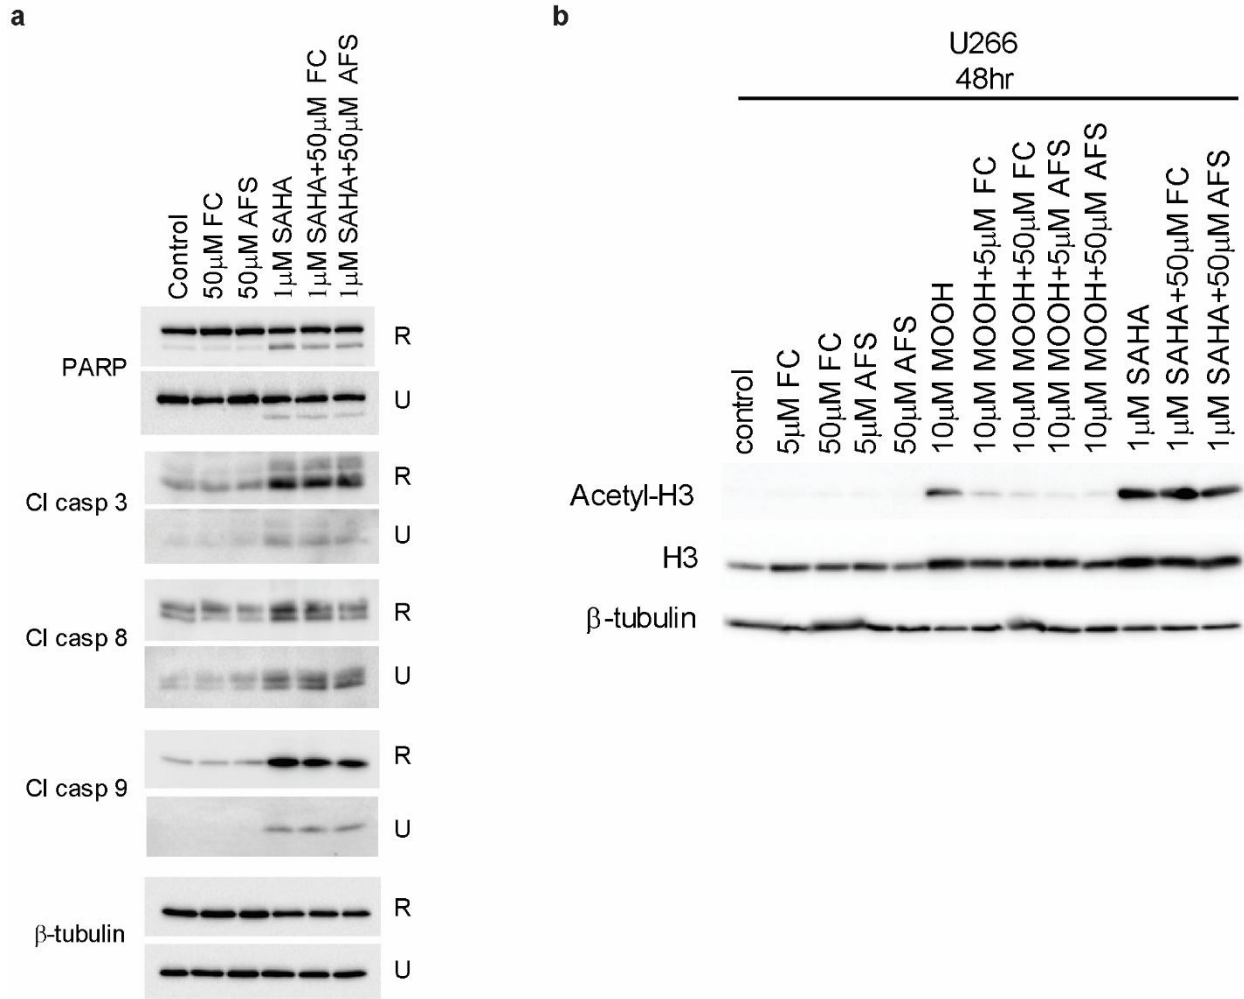

**Supplemental Figure 4. Co-incubation with iron does not alter SAHA-induced apoptosis or changes in histone acetylation. a)** RPMI-8226 (R) and U266 (U) cells were treated for 48 hours with either solvent control (DMSO) or combinations of  $\text{FeCl}_3$  (FC),  $\text{FeSO}_4$  (AFS) and SAHA. Protein levels of PARP and cleaved caspases (3, 8, and 9) were assessed via immunoblot.  $\beta$ -tubulin served as a loading control. **b)** U266 were treated for 48 hours with DMSO or a combination of FC, AFS, MO-OH-Nap (MOOH) or SAHA. Protein levels of acetylated histone H3 and total histone H3 were measured via immunoblot.  $\beta$ -tubulin served as a loading control.

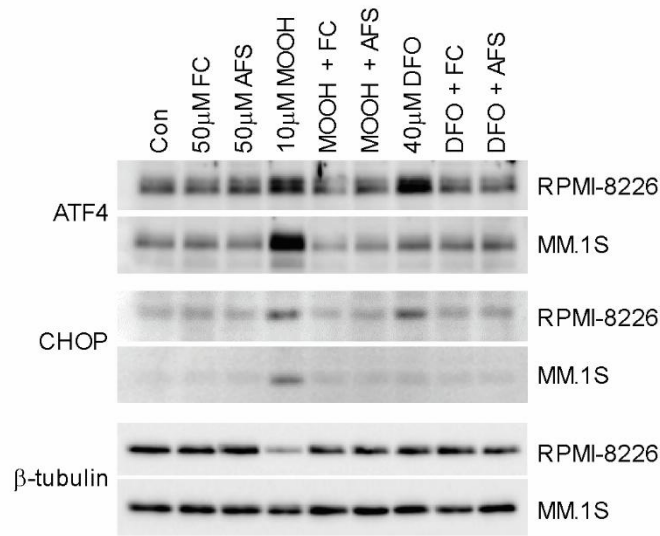

**Supplemental Figure 5. Co-incubation with iron reversed the MOOH and DFO induced upregulation of ATF4 and CHOP.** RPMI-8226 and MM.1S cells were treated for 48 hours with DMSO, MO-OH-Nap or DFO in the presence or absence of FC and AFS. Protein levels of ATF4, CHOP and  $\beta$ -tubulin were measured by immunoblot. Immunoblots are representative of three independent experiments.

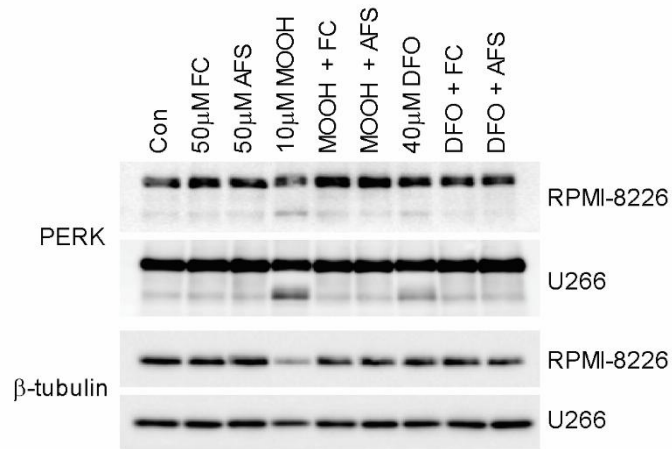

**Supplemental Figure 6. MOOH induces cleavage of PERK.** RPMI-8226 and MM.1S cells were treated for 48 hours with DMSO, MO-OH-Nap or DFO in the presence or absence of FC and AFS. Protein levels of PERK and  $\beta$ -tubulin were measured by immunoblot. Immunoblots are representative of three independent experiments.



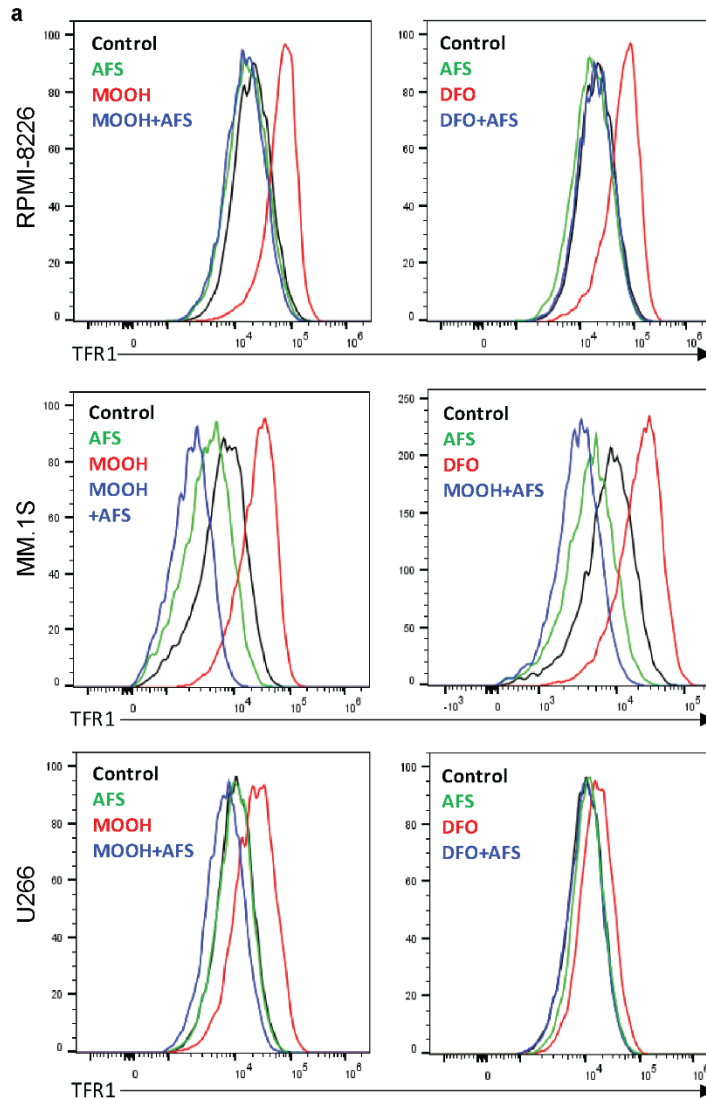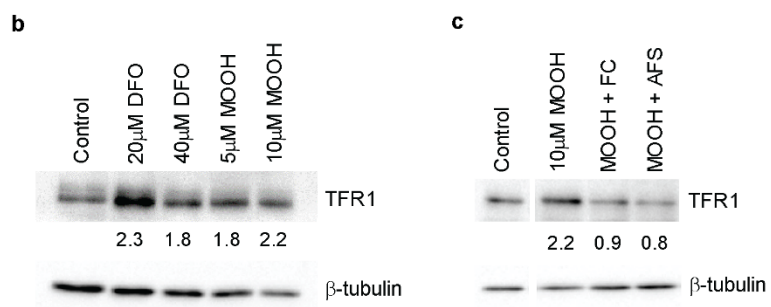

**Supplemental Figure 7. DFO and MO-OH-Nap induce upregulation of transferrin receptor protein.** a) Flow cytometry analysis of TFR1 surface protein. Flow histograms are representative examples where the x-axis represents TFR1 levels. b) and c) Immunoblot of TFR1 protein levels in U266 cells following 48-hour treatment with (b) DMSO (control), DFO, or MO-OH-Nap (MOOH) and (c) MOOH in combination with 50 µM FeCl<sub>3</sub> (FC) or FeSO<sub>4</sub> (AFS). β-tubulin is shown as a loading control. Relative fold change values for TFR1 are shown (calculated using densitometry in ImageJ and normalized to loading control).

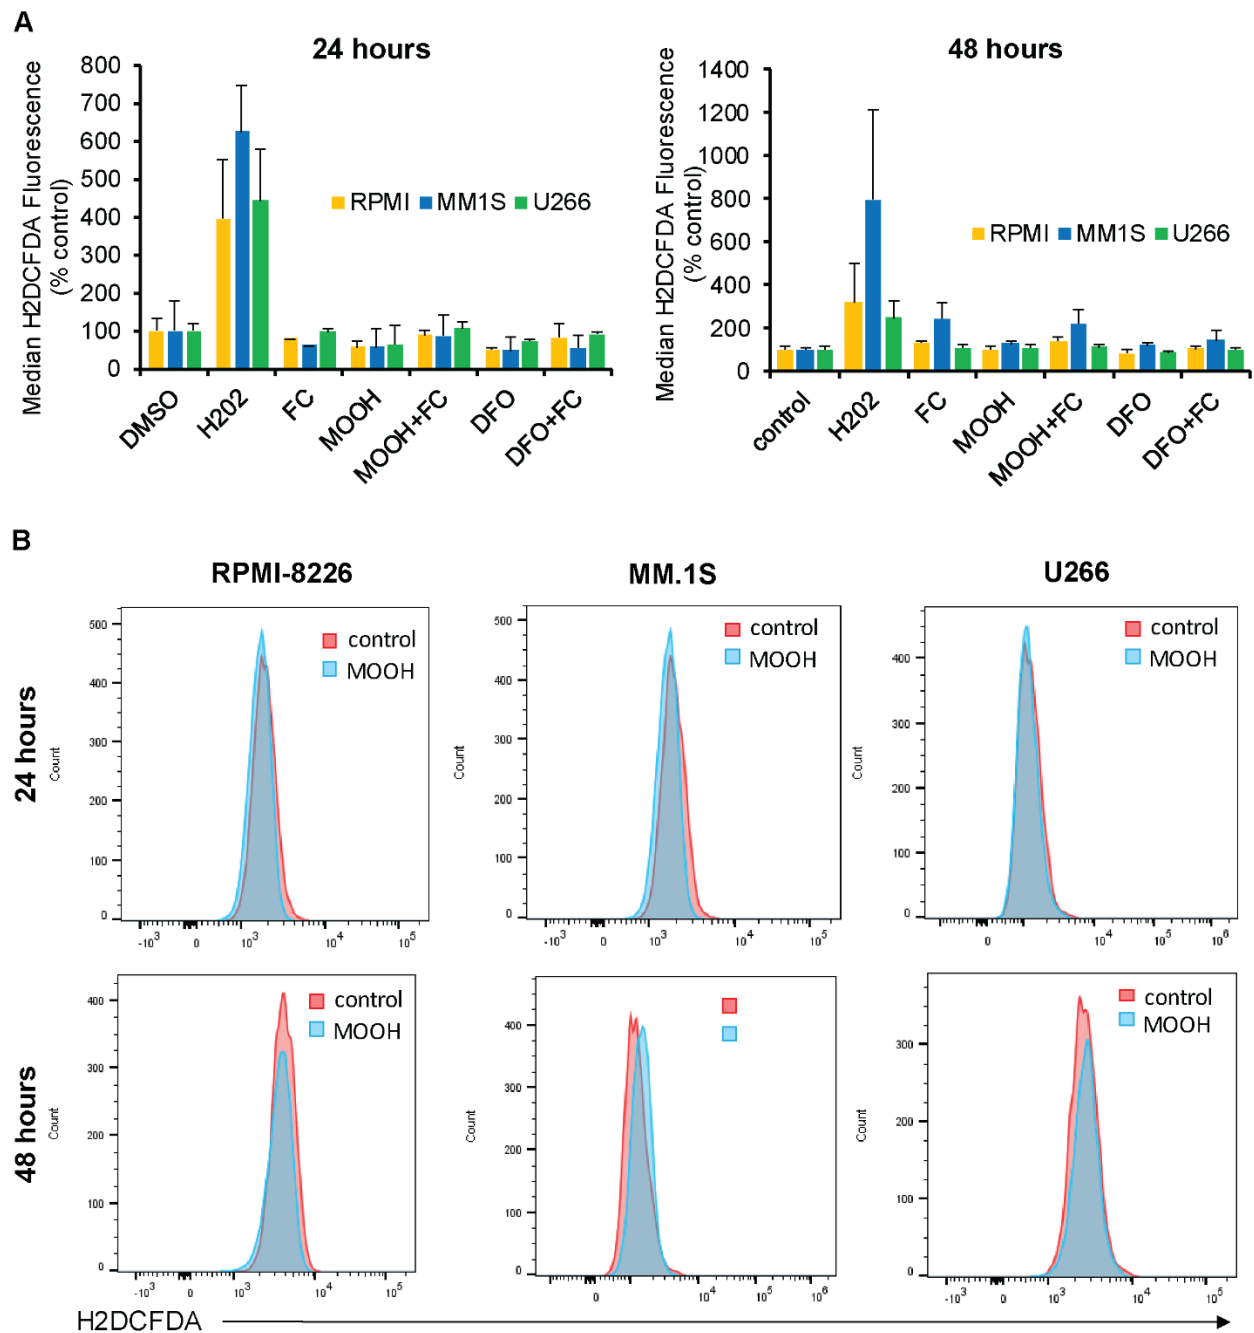

**Supplemental Figure 8. MO-OH-Nap does not induce changes in reactive oxygen species in MM cells.** a) Summary of flow cytometry analysis of H2DCFDA fluorescence in U266, RPMI-8226, and MM.1S cells treated with MO-OH-Nap (denoted as MOOH; 2.5  $\mu$ M for RPMI-8226/MM.1S and 10  $\mu$ M U266) or 40  $\mu$ M DFO with or without 50  $\mu$ M FC. Data are shown as mean  $\pm$  S.D. (n=3). b) Representative flow examples of 24 and 48 hour MO-OH-Nap treatment. Fluorescence of CM-H2DCFDA is shown on the X-axis.

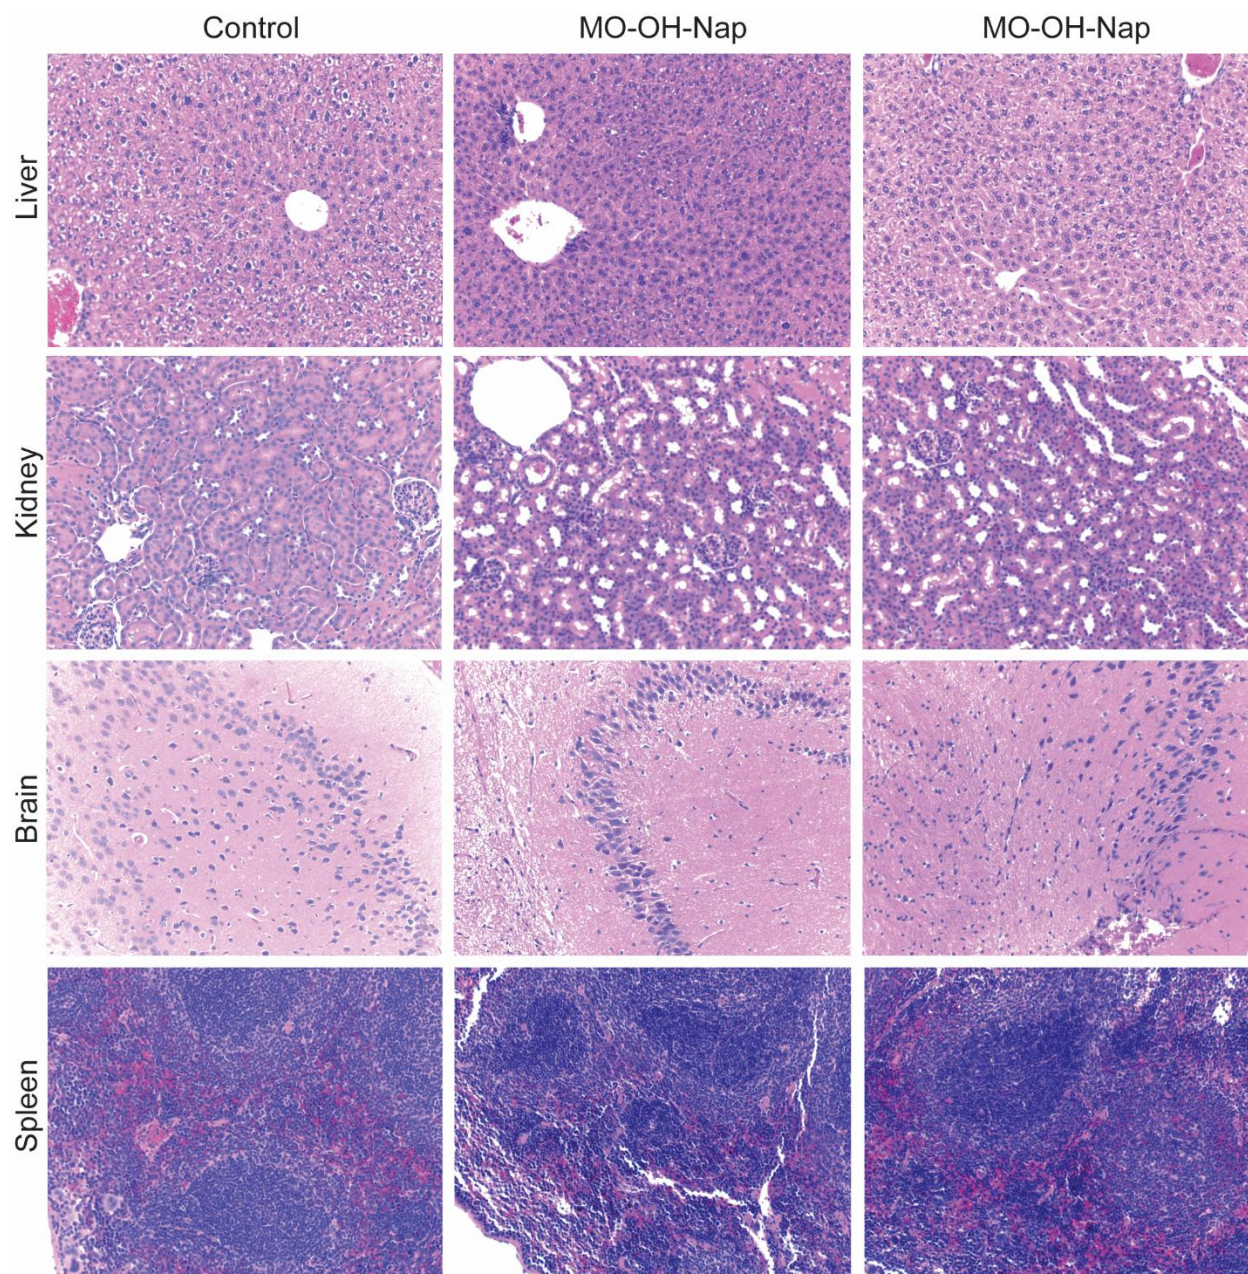

**Supplemental Figure 9. Repeat dosing of MO-OH-Nap does not cause changes in organ histology.** H&E sections of liver, spleen, kidney, and brain of CD-1 mice injected with 9.4mg/kg MO-OH-Nap three times per week for four weeks.

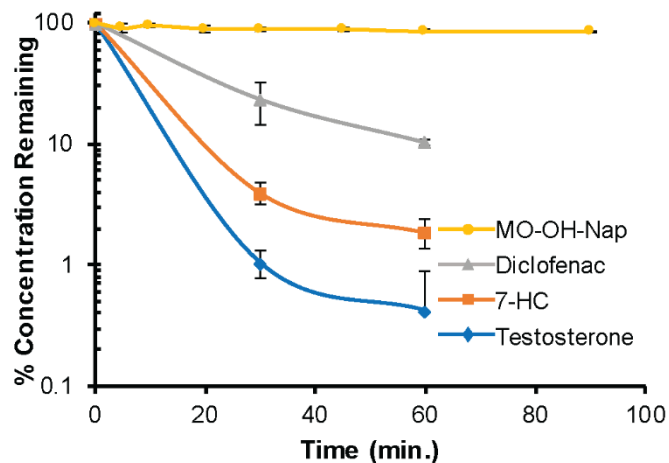

**Supplemental Figure 10. MO-OH-Nap is metabolically stable** Time-dependent metabolic depletion (% turnover or amount remaining vs. incubation time) of MO-OH-Nap, testosterone, 7-HC (7 hydroxycoumarin) and diclofenac in mouse S9 fraction. Data shown as mean  $\pm$  S.D (n=3).

| <b>Antibody</b>                   | <b>Company</b> | <b>Cat. #</b> | <b>Dilution</b> |
|-----------------------------------|----------------|---------------|-----------------|
| <b>ATF-4</b>                      | Cell Signaling | 11815         | 1:1000          |
| <b>CHOP</b>                       | Cell Signaling | 2895          | 1:300           |
| <b>Cleaved Caspase 3</b>          | Cell Signaling | 9664          | 1:500           |
| <b>Cleaved Caspase 8</b>          | Cell Signaling | 9496          | 1:500           |
| <b>Cleaved Caspase 9</b>          | Cell Signaling | 9501          | 1:500           |
| <b>eIF2<math>\alpha</math></b>    | Cell Signaling | 9722          | 1:1000          |
| <b>p-eIF2<math>\alpha</math></b>  | Cell Signaling | 3597          | 1:1000          |
| <b>IRE1<math>\alpha</math></b>    | Cell Signaling | 3294          | 1:2000          |
| <b>PERK</b>                       | Santa Cruz     | sc-377400     | 1:1000          |
| <b>PARP</b>                       | Santa Cruz     | sc-7150       | 1:10,000        |
| <b><math>\beta</math>-Tubulin</b> | Sigma          | T5201         | 1:25,000        |
| <b>TFR1</b>                       | Santa Cruz     | sc-32272      | 1:250           |
| <b>Acetyl-Histone H3 (Lys 9)</b>  | Cell Signaling | 9649          | 1:3000          |
| <b>Acetyl-Histone H3 (Lys 23)</b> | Cell Signaling | 14932         | 1:1000          |

**Supplementary Table 1: Antibodies used for western blotting.**

|               | Normal               | 9.4mg/kg<br>3x/wk |
|---------------|----------------------|-------------------|
| <b>WBC</b>    | 3-15 $10^3 /mm^3$    | 5.65              |
| <b>RBC</b>    | 5-12 $10^6 /mm^3$    | 8.445             |
| <b>HGB</b>    | 11-18 g/dl           | 15.15             |
| <b>HCT</b>    | 36-52%               | 42.75             |
| <b>PLT</b>    | 140-600 $10^3 /mm^3$ | 899.5             |
| <b>MCV</b>    | 44 -69 fl            | 51                |
| <b>MCH</b>    | 12 -24.5 pg          | 18                |
| <b>MCHC</b>   | 21.6-42 g/dl         | 35.35             |
| <b>RDW</b>    | 21 -25%              | 12.45             |
| <b>MPV</b>    | 4.6 -7.3 fl          | 5.3               |
| <b>% LYMP</b> | 17 -48%              | 55.75             |
| <b>%MON</b>   | 4 -10%               | 11.55             |
| <b>%GRA</b>   | 43 -76%              | 32.7              |
| <b>#LYM</b>   | 1.2-3.2 $10^3 /mm^3$ | 3.1               |
| <b>#MOH</b>   | 0.3-0.8 $10^3 /mm^3$ | 0.6               |
| <b>#GRA</b>   | 1.2-6.8 $10^3 /mm^3$ | 1.95              |

**Supplemental Table 2. CBC analysis.** Mice were injected IV with 9.4 mg/kg MO-OH-Nap 3 times per week for four weeks (n=2). Blood was collected at the time of harvest. Abbreviation: white blood cell (WBC), red blood cell (RBC), hemoglobin (HGB), hematocrit (HCT), platelets (PLT), mean corpuscular volume (MCV), mean corpuscular hemoglobin (MCH), mean corpuscular hemoglobin count (MCHC), red cell distribution (RDW), mean platelet volume (MPV), lymphocytes (LYM), monocytes (MON), and granulocytes (GRA)

|                                | <b>Normal</b> | <b>9.4mg/kg 3x/wk</b> |
|--------------------------------|---------------|-----------------------|
| <b>BUN (MG/DL)</b>             | 9-33          | 17.5                  |
| <b>CRE (MG/DL)</b>             | 0.2-0.9       | 0.2                   |
| <b>ALT (U/L)</b>               | 17-73         | 38.5                  |
| <b>ALP (U/L)</b>               | 35-222        | 57.5                  |
| <b>AST (U/L)</b>               | 54-298        | 162                   |
| <b>TBIL (MG/DL)</b>            | 0-0.9         | 0.3                   |
| <b>GLU (MG/DL)</b>             | 140-263       | 233                   |
| <b>CA (MG/DL)</b>              | 6-13          | 11.15                 |
| <b>TP (G/DL)</b>               | 3.9-6.4       | 5.8                   |
| <b>ALB (G/DL)</b>              | 2.5-4.6       | 4.45                  |
| <b>GLOB (G/DL)</b>             | 1.2-2.2       | 0.85                  |
| <b>Na (mmol/L)</b>             | 110-195       | 150.5                 |
| <b>K (mmol/L)</b>              | 4-10.5        | 8.5                   |
| <b>Cl<sup>-</sup> (mmol/L)</b> | 110-128       | 110                   |
| <b>TCO2 (mmol/L)</b>           | NR            | 27                    |

**Supplemental Table 3. Blood chemistry panel.** Mice were injected IV with 9.4 mg/kg MO-OH-Nap 3 times per week for four weeks (n=2). Blood was collected at the time of harvest. Abbreviations: blood urea nitrogen (BUN), creatinine (CRE), alanine amino-transferase (ALT), alkaline phosphatase (ALP), aspartate aminotransferase (AST), total bilirubin (TBIL), glucose (GLU), total protein (TP), albumin (ALB), globulin (GLOB) and NR (not reported)
